# 1 Rewinding the molecular clock in the genus *Carabus* (Coleoptera: Carabidae) in light of 2 fossil evidence and the Gondwana split: a re-analyses.

3 Lars Opgenoorth\*, Philipps-University Marburg, Fachbereich Biologie, Allgemeine Ökologie und  
4 Tierökologie, Karl-von-Frisch Str. 8, D-35043 Marburg, Germany, [opgenoorth@uni-marburg.de](mailto:opgenoorth@uni-marburg.de)  
5 WSL Swiss Federal Research Institute, Zuercherstrasse 111, 8903 Birmensdorf, Switzerland

6 Sylvia Hofmann, Zoological Research Museum Alexander Koenig, Centre of Taxonomy and  
7 Evolutionary Research, Adenauerallee 160, 53113 Bonn, [s.hofmann@leibniz-zfmk.de](mailto:s.hofmann@leibniz-zfmk.de)

8 Joachim Schmidt\*, Universität Rostock, Institut für Biowissenschaften, Allgemeine und Spezielle  
9 Zoologie, Universitätsplatz 2, 18055 Rostock, [schmidt@agonum.de](mailto:schmidt@agonum.de)

10 \*corresponding authors

## 11 1 Abstract

12 **Background** Molecular clocks have become powerful tools given increasing sequencing and  
13 fossil resources. However, outcome of calibration analyses depend on choosing priors. Here we  
14 revisit a seminal dating study of the genus *Carabus* by Andujar et al. proposing that their prior  
15 choices need re-evaluation with the hypothesis that reflecting fossil evidence and the  
16 Gondwanan split properly rewinds the molecular clock significantly. We used the same dataset  
17 including five mitochondrial and four nuclear DNA fragments with 7888 nt total length. We set  
18 the root age based on the fossil evidence of Harpalinae ground beetles in the Upper Cretaceous  
19 and introduce the Paleogene divergence of the outgroup taxa *Ceroglossus* (endemic to South-  
20 America) and *Pamborus* + *Maoripamborus* (Australia, New Zealand) as a new prior based on  
21 current paleontological and geological literature.

22 **Results** The ultrametric time-calibrated tree of the extended nd5 dataset resulted in a median  
23 TMRCA *Carabus* age of 58.48 Ma (HPD95% 46.61-72.04), roughly 35 Ma older than in the  
24 Andujar study. The splits between *C. rugosus* and *C. morbillosus* (A), between *C. riffensis* from  
25 the European *Mesocarabus* (B), and between *Eurycarabus* and *Nesaeocarabus* (C) were dated  
26 to 19.19 (13.54-25.87), 25.95 (18.8-34.62), and 23.98 (17.28-31.47) Ma and were thus decidedly  
27 older than previously reported (7.48, 10.93, and 9.51 Ma). These changes were driven solely by  
28 constraining the Carabidae time tree root with Harpalinae amber fossils at ~99 Ma. Utilizing the  
29 nd5 dating results of three well supported *Carabus* clades as secondary calibration points for the  
30 complete MIT-NUC data set lead to a TMRCA of *Carabus* of 53.56 (41.25-67.05) Ma compared  
31 to 25.16 (18.41-33.04) in Andujar's study.

32 **Conclusion** Taking into account the Gondwanan split as a new prior, together with the fossil  
33 evidence of the outgroup taxon Harpalini in the Late Cretaceous, our new approach supports an  
34 origin of the genus *Carabus* in the Paleocene-Early Eocene. Our results are preliminary due to  
35 the heavy reliance on the nd5 gene and thus will have to be tested with sufficient set of nuclear  
36 markers. In addition, uncertainties arise from dating the root age of the tree based on a single  
37 fossil and outgroup taxon which has a major effect on the results. Improvement of the fossil data  
38 base particularly in the supertribe Carabitaе is thus strongly needed to reduce the currently large  
39 uncertainties in dating *Carabus* phylogeny.

40 **Keywords** *Carabus*, calibration, time-tree, Paleogene

41

42

## 43 2 Background

44 The molecular clock has become an increasingly powerful tool in biogeography and  
45 phylogenetics due to the ever-increasing genomic and fossil calibration data <sup>1</sup>. However,  
46 phylogenetic dating is largely performed in Bayesian frameworks where the choice and number  
47 of calibration priors have a deciding impact on dating results <sup>1,2</sup>. Consequently, there is often still  
48 a huge dating variance among studies even dealing with identical taxa and employing identical  
49 calibration points. Important factors for the disagreement are the placement of fossils in a given  
50 phylogeny and the handling of geological priors. The first is a matter of taxonomic discussion  
51 among species group specialists. Recent methodological improvements for better analyses of  
52 hidden characters in fossils like the usage of X-ray micro-computed tomography of amber  
53 inclusions to determine internal genital characteristics of tiny beetles <sup>3,4</sup> may help to resolve  
54 ambiguities in the long term. The handling of geological priors, on the other hand, is a broader  
55 discussion where the improvement could and should be somewhat more predictable and  
56 transparent across taxonomic groups. However, exactly in this part of the equation one can  
57 observe an almost arbitrary choice of geological sources and thus setting of respective molecular  
58 clocks <sup>5</sup>. One classical geological event that has broadly left its imprint on biogeographic patterns  
59 is the split up and fragmentation of the Gondwanan landmasses <sup>6</sup>. Studying the widely reviewed  
60 biogeographical literature dealing with the Gondwanan split it becomes evident that two general  
61 patterns emerge. Taxa that are good dispersers and occur on a broad range of terrestrial habitats  
62 have very diverse phylogeographic histories, often independent of the timing of the Gondwanan  
63 fragmentation. On the other side are taxa with poor dispersal capabilities and often very specific  
64 habitat preferences. Their evolutionary histories reflect the trademark vicariance pattern <sup>6</sup>.  
65 Examples range from chironomid midges <sup>7</sup>, stoneflies <sup>8</sup>, scorpions <sup>9</sup>, anurans <sup>10</sup> to plants such  
66 as *Nothofagus* <sup>11</sup>, but see <sup>12</sup>. Only for this second category (poor dispersers), the geological  
67 record is a means to calibrate the molecular clock.

68 Here, we want to revisit a seminal study for the calibration of the phylogeny of *Carabus* ground  
69 beetles <sup>13</sup> reflecting both, fossil evidence for the outgroup and recent geological as well as  
70 biogeographical consensus on the fragmentation of the Gondwanan landmasses. *Carabus*  
71 generally is described as a Holarctic genus that currently counts about 940 described species  
72 classified into 91 subgenera <sup>14</sup>. Its diversification is bound to the Holarctic with a distribution  
73 throughout Eurasia, Japan, Iceland, the Canary Islands, North Africa, and North America <sup>14-18</sup>.  
74 *Carabus* represents the most species diverse terminal clade of the “supertribe Carabitae” which  
75 also includes the Holarctic Cychrini, the Andean Ceroglossini (= *Ceroglossus*), the Australasian  
76 Pamborini (= *Pamborus* + *Maoripamborus*), and the cosmopolitan Calosomina (= *Calosoma*  
77 *sensu lato*). The latter was identified as the sister group of *Carabus* based on molecular data  
78 <sup>13,19-22</sup> which is in agreement with the morphological data <sup>15</sup>.

79 Besides a Messinian fossil of *Carabus cancellatus sensu lato* <sup>23</sup>, no additional fossil evidence is  
80 known for Carabitae older than the Pliocene and Quaternary periods. However, the poor fossil  
81 evidence certainly does not reflect the evolutionary age of the group. Based on an evolutionary  
82 model proposed by Terry L. Erwin in 1979 <sup>24</sup> the Carabitae represents a very old lineage of  
83 Geadephaga with its primary diversification reflecting continental drift events during the late Early  
84 Cretaceous. Penev et al. <sup>15</sup> propose that species belonging to the recent genera *Calosoma* and  
85 *Carabus* were present at least in the early Cenozoic time. The dates of the molecular  
86 phylogenetic study of Toussaint & Gillet<sup>20</sup> correspond with these hypotheses, estimating the  
87 origin of Carabitae to about 170 Ma and the *Calosoma* - *Carabus* split to the Cretaceous. For  
88 divergence time estimation the split of Trachypachidae and Carabidae (estimated 200 Ma) was  
89 used from a reanalysis of the data of a previous study of McKenna et al. <sup>25</sup> using 34 Carabitae  
90 outgroup fossils <sup>26</sup>. The most recent comprehensive analysis of Coleoptera molecular evolution  
91 was presented by McKenna et al. <sup>27</sup> and shows the Trachypachidae - Carabidae split at 170 Ma  
92 and the *Calosoma* - *Carabus* split in the Late Eocene and therewith, distinctly later as estimated  
93 by Toussaint & Gillet <sup>20</sup>. For divergence time estimation McKenna et al. <sup>27</sup> selected 18 Carabitae  
94 outgroup fossils.

95 All these hypotheses are in more or less strong contrast to the molecular evolutionary models  
96 proposed by Andujar et al.<sup>13</sup> and Deuve et al.<sup>14</sup> with divergence time estimations mainly based  
97 on geological events. The latter authors propose the first diversification of Carabidae in the  
98 Paleocene-Eocene with a split of *Calosoma* and *Carabus* not until before the Oligocene. Such  
99 an Oligocene-Miocene emergence of the megadiverse genus *Carabus* is surprising with respect  
100 to the fossil evidence in the Carabidae family. Recent studies of Baltic amber inclusions make  
101 clear that representatives of modern ground beetle genera already existed during the Eocene,  
102 even those from the subfamily Harpalinae, with certain fossil species of the extant genera  
103 *Calathus* of the tribe Sphodrini<sup>28</sup>, *Coptodera* of Lebiini<sup>29</sup>, and *Limodromus* of Platynini<sup>30</sup>. Also,  
104 the presence of Harpalinae is evident in the fossil record since the early Late Cretaceous<sup>31–33</sup>.  
105 Finally, there is certain evidence from molecular genetic studies that Carabidae are  
106 phylogenetically older than Harpalinae<sup>34–36</sup>, and that Harpalinae underwent rapid speciation in  
107 the Late Cretaceous and Early Cenozoic<sup>33,37,38</sup>. In this regard, the question arises why the  
108 Carabidae would have undergone this markedly long phylogenetic standstill that would result  
109 from the timing proposed by Andujar et al. lasting a period of not less than 50-60 Ma.

110 This obvious dilemma leads us to revisit the dating background of the molecular study of the  
111 genus *Carabus* by Andujar et al.<sup>13</sup>, not least because the evolutionary scenario proposed for this  
112 group was subsequently used by other researchers for dating approaches of their phylogenies  
113 of non-Carabidae taxa (e.g.,<sup>39–42</sup>). As we will show in the Material & Methods section in detail,  
114 Andujar et al.<sup>13</sup> did include several classical geological calibration events, namely the  
115 emergence of the Canary Islands, the Messinian salinity crisis i.e. opening of the strait of  
116 Gibraltar, and the disconnection of Japan from the mainland. In all three cases, we argue, that  
117 the approach chosen by them is not plausible from paleogeographical and paleoecological  
118 standpoints, respectively, but reflects a very common oversimplification of historical dispersal  
119 mechanisms. Also, we focus on another important issue of the Carabidae evolution: From a  
120 biogeographical point of view, particularly remarkable are the South American genus  
121 *Ceroglossus* and the Australasian genera *Pamborus* and *Maoripamborus*, which together form  
122 the sister clade to *Carabus* and Calosomina based on molecular data<sup>19,20</sup>. A previous  
123 morphology-based hypothesis of the close relationship of *Pamborus* and *Maoripamborus* with  
124 the Cychrini tribe was identified to be a result of convergence<sup>43</sup>. This view is also confirmed by  
125 the molecular data since Cychrini take the basal position within the “supertribe Carabidae” in  
126 previous studies<sup>13,20,34</sup>. The split of the South American and Australasian taxa offers an additional  
127 possibility to calibrate the *Carabus* phylogeny. Since Andujar et al.<sup>13</sup> neglected this calibration  
128 point, we propose that their time tree massively underestimates the true age of the genus  
129 *Carabus* as was already presumed by Toussaint & Gillet<sup>20</sup>.

130 In the light of these considerations, we hypothesize that i) adding a root age based on fossil  
131 evidence for Harpalinae and the inclusion of the Gondwanan split will push the dating of the  
132 crown age of *Carabus* to at least the Eocene and ii) a proper adjustment of the geological  
133 calibration points used by Andujar et al.<sup>13</sup> will resolve putative contradictions between those and  
134 the fossil data as well as the Gondwanan split. To test these hypotheses we here reanalyzed the  
135 datasets of Andujar et al.<sup>13</sup>. Specifically, our new calibration strategy was based on a review of  
136 recent geological and biogeographical literature dealing with i) taxa that have a Gondwanan  
137 distribution, extracting minimum and maximum calibration ages; ii) the onset of the Canary  
138 hotspot using the taxonomic split between mainland and island taxa instead of island taxa only,  
139 and iii) the uplift of the North-African mountains. Finally, we will use our findings of the *Carabus*  
140 time tree to discuss the general need for a more differentiated and transparent usage of  
141 geological calibration points depending on life-history traits and habitat requirements of the taxa  
142 under study.

143

144

## 145 **3 Methods**

### 146 **3.1 Phylogenetic data sets**

147 For direct comparability of dating results, three phylogenetic data sets presented by Andujar<sup>13</sup>  
148 were utilized here based on the alignments deposited from Andujar and coworkers at treebase  
149 under the submission number 12410: [http://purl.org/phylo/tree-](http://purl.org/phylo/treebase/phylo/phylo/study/TB2:S12410)  
150 [base/phylo/phylo/study/TB2:S12410](http://purl.org/phylo/treebase/phylo/phylo/study/TB2:S12410).

151 In short, the first data set is based on nd5 sequences from 58 Carabidae species and will be  
152 referred to as the extended nd5 dataset. It includes 57 species of the supertribe Carabitae, with  
153 51 species of the genus *Carabus* representing 16 subgenera and seven of the 13 main *Carabus*  
154 clades identified by Deuve et al. [14], one species each of the genera *Calosoma*, *Ceroglossus*,  
155 *Maoripamborus*, *Cychrus*, and two species of *Pamborus*, and the Harpalinae species *Abax*  
156 *parallelepipedus* as outgroup taxon.

157 The second data set included 34 specimens of the Carabidae family, including 19 species of the  
158 genus *Carabus*, two species of its sister taxon *Calosoma*, one species each of *Ceroglossus*,  
159 *Cychrus* (representatives of the supertribe Carabitae), as well as the Nebriitae species *Leistus*  
160 *spinibarbis* and the Harpalinae species *Laemostenus terricola* as outgroup taxa. Alignments  
161 were available for the mitochondrial genes *cox1-A*, *cox1-B*, *nd5*, *cytb*, *rrnL* and the nuclear genes  
162 *LSU-A*, *LSU-B*, *ITS2*, and *HUWE1*. A third data set is a subset of this second data set and only  
163 includes the ingroup, i.e. *Carabus* species.

### 164 **3.2 Calibration strategy**

165 In Table 2, the calibration scheme from Andujar et al.<sup>13</sup> used on the nd5 extended data set is  
166 shown. Table 3 shows the equivalent calibration scheme used in this study. Specifically, we follow  
167 the Andujar approach only in relation to the *Carabus cancellatus* fossil from France (F). Our  
168 treatment of the other calibration priors will be explained in the next paragraphs. Similar as in  
169 Andujar et al.<sup>13</sup> we used the resulting calibrated phylogeny to obtain ages for three well-  
170 supported cladogenetic events in the phylogeny of *Carabus* taking on the identical nomenclature  
171 for the respective splits between *Carabus (Macrothorax) rugosus* and *C. (Macrothorax)*  
172 *morbillosus* (Node A), *C. (Mesocarabus) riffensis* from the European *Mesocarabus* clade (Node  
173 B), and the split between the sister subgenera *Eurycarabus* and *Nesaeocarabus* (Node C).  
174 These nodes were selected by Andujar and coworkers because they are not (i) affected by  
175 systematic conflict, are (ii) old enough to avoid time dependence effects, and (iii) not excessively  
176 affected by saturation of molecular change. We used TreeStat 1.7.1 [48] to recover node ages  
177 from the sample of the MCMC search in BEAST and used the R MASS package<sup>44</sup> to obtain the  
178 gamma function with the “fitdistr” function (Table 4).

#### 179 **3.2.1 Canary Islands prior**

180 Using endemic lineages from island hotspots to date phylogenetic trees remains a problematical  
181 approach because the true age of a lineage might be older than the islands themselves given  
182 their hotspot origin (see Heads 2014<sup>45</sup> for a comprehensive discussion of this problem). In  
183 Andujar et al.<sup>13</sup> the emergence of Gran Canaria (ca 14.5 Ma) was used to date the split of  
184 *Carabus (Nesaeocarabus) coarctatus* (Gran Canaria) and *C. (N.) abbreviatus* (Tenerife). This  
185 approach is based on the hypothesis that divergence occurred immediately after the emergence  
186 of Gran Canaria and then only one of the species migrated to the later emerged Tenerife (11.9  
187 Ma<sup>46</sup>) and at the same time went extinct in the original one. We propose that it is more  
188 parsimonious that the ancestral *Nesaeocarabus* species migrated to the Canary Hotspot before  
189 the emergence of Gran Canaria and Tenerife, respectively, and diversification occurred on one  
190 or more of the presumed older islands which are submerged today. Under this scenario,  
191 migration of *Nesaeocarabus* species to Gran Canaria and Tenerife was possible from any older

192 island of which no date of their respective submergence is available. Consequently, using the  
 193 emergence of only one of the recent islands to date splits within *Nesaeocarabus* is potentially  
 194 misleading and needs to be relaxed to account for the alternative possibility. This is achieved by  
 195 instead using the age of the Canary Hotspot and the split of *Nesaeocarabus* from the mainland  
 196 *Eurycarabus* as island habitats could have been present since the upstart of the hotspot. Since  
 197 the age of the Canary Hotspot has been proposed to be 60 Ma based on Kinematic studies <sup>47</sup>  
 198 we set the prior on the split between *Nesaeocarabus* and *Eurycarabus* to 60 Ma using a uniform  
 199 distribution as no additional information is available that would favour a specific time.

200 **Table 3 Calibration scheme from Andujar et al. 2012** <sup>13</sup>. Denomination of the evolutionary events follows the Andujar  
 201 study.

| Evolutionary event: node                                                                                                                        | Calibration event                            | Event age (Ma) | Priors on node ages                                                | Prior 95% age interval |
|-------------------------------------------------------------------------------------------------------------------------------------------------|----------------------------------------------|----------------|--------------------------------------------------------------------|------------------------|
| <b>C</b>   Split between two Canarian endemic species: <i>Carabus</i> ( <i>Nesaeocarabus</i> ) <i>coarctatus</i> and <i>C. (N.) abbreviatus</i> | Volcanic emergence of Gran Canaria           | 14.5           | Uniform (a = 0, b = 14.5)                                          | 0.03-14.14             |
| <b>F</b>   <i>Carabus</i> ( <i>Tachypus</i> ) <i>cancellatus</i> fossil                                                                         | Messinian deposits of Cantal (France)        | 5              | Lognormal ( $\mu = 25$ , $\sigma = 1.5$ , offset = 5)              | 5.4-158.5              |
| <b>J1</b>   Radiation of <i>Damaster</i>                                                                                                        | Final disconnection of Japan from mainland   | 3.5            | Truncated Normal ( $\mu = 3.5$ , $\sigma = 1$ , a = 0.1, b = 1000) | 1.55-5.46              |
| <b>J2</b>   Radiation of <i>Leptocarabus</i>                                                                                                    | Final disconnection of Japan from mainland   | 3.5            | Truncated Normal ( $\mu = 3.5$ , $\sigma = 1$ , a = 0.1, b = 1000) | 1.55-5.46              |
| <b>J3</b>   Radiation of <i>Ohomopterus</i>                                                                                                     | Final disconnection of Japan from mainland   | 3.5            | Truncated Normal ( $\mu = 3.5$ , $\sigma = 1$ , a = 0.1, b = 1000) | 1.55-5.46              |
| <b>J4</b>   Split between subgenus <i>Isiocarabus</i> and <i>Ohomopterus</i>                                                                    | Initial disconnection of Japan from mainland | 15             | Normal ( $\mu = 15$ , $\sigma = 1$ )                               | 13.04-16.96            |
| <b>M2</b>   Split between <i>Carabus</i> ( <i>Eurycarabus</i> ) <i>genei</i> from Corsica and North African <i>Eurycarabus</i>                  | Opening Gibraltar strait                     | 5.33           | Exponential ( $\mu = 0.5$ , offset = 5.3)                          | 5.31-7.14              |
| Split between two <i>Carabus</i> ( <i>Rhabdotocarabus</i> ) <i>melancho-licus</i> subspecies: <b>M3</b>                                         | Opening Gibraltar strait                     | 5.33           | Exponential ( $\mu = 0.5$ , offset = 5.3)                          | 5.31-7.14              |

202

### 203 3.2.2 Japan prior

204 We omit the four calibration points from Japan following the logic, that neither the final nor the  
 205 initial disconnection of Japan from the mainland is mandatory for the radiation of the *Carabus*  
 206 lineages *Damaster*, *Leptocarabus*, and *Ohomopterus*, and the split between *Isiocarabus* and  
 207 *Ohomopterus*, respectively, but the availability of their habitat. The Asian Far East with the dense  
 208 ensemble of the complex folding systems of Kamchatka, Sikhote Alin, the Sakhalin, and Korean  
 209 peninsulas, the Japanese Islands, and the Kurile island arc, was geomorphologically highly  
 210 diverse long before the initial disconnection of Japan <sup>48,49</sup>. Therefore, during the Late Cenozoic,  
 211 the occurrence of suitable habitats for temperate *Carabus* has to be assumed particularly along  
 212 slopes of the many, more or less separated mountain arcs and volcanos of the area.  
 213 Consequently, it is highly probable that separation of the lineages was linked to the particular  
 214 geomorphology of the area and the resulting differences in the regional climate and therewith,  
 215 has predated the splitting events of the Japanese Islands from continental Asia markedly. We,  
 216 therefore, conclude that concerning the biogeographical history of ground beetles and other soil  
 217 arthropods these geological events are not suitable calibration events. This conclusion is  
 218 supported by the well-known fact that ground beetle faunas of the more or less directly adjacent  
 219 mountain systems of Europe and continental Asia, which were not separated by sea during the

220 Late Cenozoic, each are markedly differentiated. In this respect, the most impressive example  
221 is complex mountain ensemble of High Asia: The *Carabus* faunas of the Pamir, Greater Himalaya  
222 and Tibet (with the mountains of Western China) differ by nearly 100% even on the subgeneric  
223 level and is thus much more profoundly differentiated than that of the faunas of Japan and the  
224 Asian mainland<sup>50</sup>. On the other hand, most of the main *Carabus* lineages were able to fly at  
225 least in the evolutionary history of the respective lineage, as evidenced by their phylogeny<sup>14</sup>. For  
226 the early evolutionary history of the group, a sea can thus be considered a barrier with restricted  
227 efficacy for *Carabus* ground beetles. This becomes also obvious from the above-discussed  
228 occurrence of *Carabus* species on the Canary Islands because these islands never had a  
229 terrestrial connection to the continent.

### 230 **3.2.3 Gibraltar Strait vs. uplift of North African mountain ranges**

231 The genus *Carabus* is an extratropical group of beetles with its representatives adapted to the  
232 warm (meridional) to cold temperate or subarctic climates. The species are mesophilic or  
233 hygrophilic and are absent in deserts. Temperature and humidity preferences of the beetles have  
234 to be considered when using occurrences of land bridges in the past such as the closing of the  
235 Gibraltar Strait to hypothesize dispersal events. So far, there is no paleoecological indication (let  
236 alone evidence) that the climate in the depression of the Gibraltar Strait was suitable for *Carabus*  
237 during the terrestrial development of the area in the Messinian. Instead, it was hot and dry, with  
238 the occurrence of spacious salt marshes, while warm temperate conditions and occurrence of  
239 mesophilic forests developed along slopes of the mountain belts<sup>51,52</sup>. Mountains with various  
240 suitable habitats had been uplifted on both sides of the Gibraltar Strait much earlier<sup>53,54</sup>. Also,  
241 based on the current molecular phylogenetic data it has to be assumed that the ancestors of  
242 both *Carabus* subgenera *Eurycarabus* and *Rhapdotocarabus* were capable to fly since fully  
243 developed hind wings are occasionally present in *Carabus granulatus* of the more derived  
244 Digitulati group<sup>14</sup>. Consequently, multiple developments of winglessness in the evolution of  
245 *Carabus* have to be inferred. If active dispersal by flight was possible for ancestors of the taxa in  
246 question, mountain uplift in the western Mediterranean region could have been an important  
247 event for the evolution of *Rhapdotocarabus* and *Eurycarabus* species. Consequently, this  
248 scenario is completely independent of the opening and closing of the Gibraltar Strait. Therefore,  
249 we constrained the splits in these groups with the age of surface uplift of the current Rif and  
250 Maghrebian Mountains. In the Rif rapid exhumation is assumed during the Late Oligocene - Early  
251 Miocene (27-18 Ma; Monie et al. 1994<sup>55,56</sup>), and in the Maghrebian extensional deformation  
252 probably occurred at 25-16 Ma<sup>57</sup>. A significant height of these mountain ranges was thus  
253 certainly achieved in the Mid Miocene. Also, uplift of the immediately adjacent Atlas Mountains  
254 has been attributed to Cenozoic thickening of the crust and Middle to Late Miocene thinning of  
255 the mantle lithosphere related to a shallow mantle plume<sup>58,59</sup>. A significant part of the  
256 paleoelevations have been attributed to this latter mechanism, namely a third of the mean  
257 altitude of 1,500 m in the western High Atlas, and half of the mean 2,000 m in the central High  
258 Atlas<sup>58</sup>. We, therefore, conclude, that sufficient heights for suitable *Carabus* habitats were  
259 developed south of the Gibraltar Strait at least 15 Ma. We use a lognormal distribution since the  
260 arrival of the respective ancestors and separate evolution of the North African lineages could not  
261 have started before the North African mountains had reached into significant heights with suitable  
262 habitats.

### 263 **3.2.4 Split of Australia from Antarctica/South America**

264 The breakup of Gondwana has been reflected in a number of ways in biogeographic and  
265 phylogeographic reconstructions. For example, Upchurch<sup>60</sup> proposed four broadly different  
266 models namely Somafrica model, Africa-first model, Pan-Gondwana model, and trans-oceanic  
267 dispersal. However, here we are only interested in the split of Australia from Antarctica or  
268 Antarctica and South America to reflect the split between *Pamborus* with its Australian  
269 distribution and *Maoripamborus* with its New Zealand distribution (together forming the tribe  
270 Pamborini) from *Ceroglossus* (forming the monotypic tribe Ceroglossini) with its South-  
271 American distribution. Numerous studies have found reticulate histories along with the split of

272 Australia between the Late Cretaceous and the Eocene when a shallow seaway between  
 273 Australia and Antarctica likely was the last land passage between these continents <sup>10</sup>. Lately, it  
 274 was proposed that this final split was a diachronous sea-floor spreading that started in the  
 275 West 93-87 Ma, progressing to central Great Australia 85-83 Ma, followed by separation in the  
 276 western Bight at ~65 Ma and finalizing in the Terre Adelie-Otway region ~50 Ma (summarized  
 277 in <sup>61</sup>). The same authors discuss that there still is large uncertainty in connection with this  
 278 break-up history and propose that the oldest confident interpretations of magnetic seafloor  
 279 anomalies date to ~45 Ma when Australia and Antarctica finally drifted apart <sup>61</sup>. However, the  
 280 South Tasman Rise was already submerged between 50 to 32 Ma as deep as 1000 m <sup>62</sup>  
 281 making passage difficult for beetles. In summary, we again implement a conservative dating  
 282 approach concerning *Carabus* by choosing a calibration age with a minimum split at 32 Ma.  
 283 Also, we set the maximum age to 159 Ma following Andujar et al. <sup>13</sup> and Deuve et al. <sup>14</sup>. This  
 284 date is attributed to the oldest fossils which most definitely belong to the Carabidae, and are  
 285 described from the Upper Jurassic of Kazakhstan <sup>31</sup>. The much older fossil *Lithorabus incertus*  
 286 from the Lower Jurassic of Kyrgyzstan was also described within the Carabidae family <sup>63</sup>, but it  
 287 is based on a very poor imprint of few parts of the exoskeleton which is why the systematic  
 288 assignment is rather doubtful. We chose a lognormal distribution (see Table 2).

### 289 3.2.5 Fossil evidence for Harpalinae

290 As Carabidae outgroup taxon, Andujar et al. <sup>13</sup> used *Abax parallelepipedus* for their nd5 data  
 291 analyses. The genus *Abax* Bonelli is representative of the Pterostichini tribe of the ground beetle  
 292 subfamily Harpalinae *sensu* Crowson <sup>64</sup> which includes by far the most species of Carabidae.  
 293 Morphological and molecular genetic phylogenies consistently indicate the terminal position of  
 294 Harpalinae within Carabidae <sup>34,36,65</sup>. Harpalinae fossils are described from Upper Cretaceous  
 295 deposits in South Kazakhstan, Beleutin formation, Turonian (93.5-89.0 Ma <sup>63</sup>), and from the  
 296 Burmese amber (ca. 99 Ma <sup>32,33</sup>). Therefore, we set the prior for the Harpalinae to 99 Ma (see  
 297 Table 3), again with a maximum age of 158.5 following the same logic as described in 3.2.4.

298 **Table 4 Calibration strategy of this study.** Denomination of the evolutionary events follows the Andujar study <sup>13</sup> for  
 299 better comparability.

| Evolutionary event: node                                                                                                                                  | Calibration event                                   | Event age (Ma) | Priors on node ages                                         | Prior 95% age interval |
|-----------------------------------------------------------------------------------------------------------------------------------------------------------|-----------------------------------------------------|----------------|-------------------------------------------------------------|------------------------|
| <b>C</b>   Split between the Canarian endemic species <i>Carabus (Nesaeocarabus) coarctatus</i> and <i>C. (N.)</i> from the mainland <i>Eurycarabus</i> . | Volcanic emergence of the Canary Hotspot            | 60             | Uniform (upper = 60, lower = 0, offset = 0)                 | 1.5 – 58.5             |
| <b>F</b>   <i>Carabus (Tachypus) cancellatus</i> fossil                                                                                                   | Messinian deposits of Cantal (France)               | 5.3            | Lognormal ( $\mu = 25$ , $\sigma = 1.5$ , offset = 5)       | 5.43 – 159.0           |
| <b>M2</b>   Split between <i>Carabus (Eurycarabus) genei</i> from Corsica and North African <i>Eurycarabus</i> .                                          | Surface uplift of the North African mountain ranges | 15             | Lognormal ( $\mu = 15$ , $\sigma = 0.5$ , offset = 0)       | 4.97 – 35.30           |
| <b>M3</b>   Split between two <i>Carabus (Rhabdotocarabus) melanolicus</i> subspecies                                                                     | Surface uplift of the North African mountain ranges | 15             | Lognormal ( $\mu = 15$ , $\sigma = 0.5$ , offset = 0)       | 4.97 – 35.30           |
| <b>GO</b>   Split from Pamborini and Ceroglossini                                                                                                         | Split of Australia between Antarctica/South America | 32-50          | Lognormal ( $\mu = 78$ , $\sigma = 0.41$ , offset=0)        | 32.1 – 159.0           |
| <b>RO</b>   Root                                                                                                                                          | Fossil Oodini in Burmese amber                      | 99             | Lognormal ( $\mu = 130$ , $\sigma = 4.27$ , offset = 98.17) | 98.2 – 159.0           |

300

301

### 302 **3.3 Calibration analyses with an assessment of the input of each calibration** 303 **point**

304 All phylogenetic analyses were conducted with BEAST2 (version 2.5.2, <sup>66</sup>) and were run on the  
305 CIPRES Cyberinfrastructure for Phylogenetic Research <sup>67</sup>. To assess the relative contribution of  
306 each calibration point of the respective priors, we ran seven analyses by removing one of the  
307 individual calibration points from Table 3 in each of the runs, and one run with all priors included.  
308 Individual calibration point impact was assessed using violin plots produced with the R package  
309 *vioplot* <sup>68</sup>. Since the root prior proved to have such a decisive input on the overall dating, a  
310 second violinplot was drawn that excluded the root calibration in all other stepwise omissions. In  
311 all approaches, we constrained *Calosoma* to be the sister clade to *Carabus*, and used *Abax* as  
312 outgroup since these relationships have been well established <sup>34,65</sup>. Nucleotide substitution  
313 models were inferred during the MCMC analysis with *bModelTest* package <sup>69</sup> implemented in  
314 BEAST2. Otherwise, we followed the settings as in <sup>13</sup> and used a Yule process as a model of  
315 speciation, a strict molecular clock, and a random tree as a starting tree. Each run was performed  
316 with 100 million generations, sampling 10.000 trees and with a burn-in set to 10% of the samples.  
317 Convergence and stationary levels were verified with *Tracer* v1.7.1 <sup>70</sup>. We annotated the tree  
318 information with *TreeAnnotator* v.2.5.2 and visualized it with *FigTree* v.1.4.2.

### 319 **3.4 Calibration analyses of each marker and their combination**

320 The analyses of time-calibrated phylogenies employing nodes A-C generally followed Andujar et  
321 al.<sup>13</sup>. In short, median age and 95% HPD interval for the three clades were taken from the  
322 calibration analyses of the *nd5* gene with BEAST2 (version 2.5.2) extracted with *Tracer* v 1.71.  
323 These were 20.276 (15.3-26.3), 25.653 (19.8-32.7), and 23.276 (17.8-30.0) respectively.  
324 Gamma distribution was derived with the *fitdistr* function from the R package *MASS* (Shape  
325 52.599; Scale 0.389, Shape 61.144; Scale 0.423, Shape 56.317; Scale 0.417 for the nodes A,  
326 B, C). We then calculated time-calibrated phylogenetic reconstructions of each gene as well as  
327 the combinations of i) all mitochondrial genes, ii) all nuclear genes, and iii) all mitochondrial and  
328 nuclear genes were based on a run of 100 million generations. Subsequent steps followed the  
329 same protocol as in 3.3 (see above). Mean, standard error, highest posterior density intervals  
330 (HPD 95%), and effective sample size of likelihood, evolutionary rates, and the TMRCA of  
331 *Carabus* were inspected using *Tracer* 1.7.1. Consensus trees were obtained in *TreeAnnotator*  
332 2.5.2 [44] using the median age option. In all instances an uncorrelated lognormal (ULN) relaxed  
333 clock was employed. All mitochondrial data sets were analysed under a 2P codon partition  
334 scheme with site models and clock models unlinked.

## 335 **4 Results**

### 336 **4.1 Calibration analyses with the extended *nd5* data set**

337 In our calibration analyses, we used the expanded *nd5* gene dataset of Andujar et al. <sup>13</sup> and as  
338 therein implemented a strict clock and 2P codon partitioning. The ultrametric time-calibrated  
339 phylogenetic tree is shown in Figure 1 with a median TMRCA *Carabus* age of 58.48 Ma (HPD  
340 95% 46.61–72.04 Ma) which was markedly older than the age obtained in the Andujar study  
341 (Table 1). The resulting mean molecular evolution rate was 0.0073 (95% HPD 0.0056–0.0091)  
342 substitutions per site per million years per lineage (subs/s/Ma/l) compared to 0.0154 (95% HPD  
343 0.0112–0.0198) in <sup>13</sup>. Nodes A, B, and C (Figure 1) had median ages of 19.19 Ma (A), 25.95 Ma  
344 (B), and 23.98 Ma (C) (95% HPD 13.54-25.87, 18.8-34.62, and 17.28-31.47) and were thus also  
345 decidedly older than in <sup>13</sup> (7.48 Ma, 10.93 Ma, and 9.51 Ma).

346 The violin plots in Figure 2 illustrate the overall impact of each calibration point on the timing of  
347 important phylogenetic lineages by depicting the age distribution when all points are used (all)



348 and when each respective calibration point is left out of the calculation (-m2 through -root). As  
349 expected, most of this difference was attributed to the root prior which effectively overwrote any  
350 influence of other nodes as can be seen by the limited impact their omittance had on the dating  
351 results (Figure 2). This is further highlighted in Figure 3 which shows the violin plots entirely  
352 without the root prior. The graph also shows that the Gondwana calibration point had the next  
353 strongest impact on the dating, accounting for a median age shift for the Ceroglossini –  
354 Pamborini split of 10 My, thus mediating between the root and the remaining calibration points.  
355 More importantly, when included, clades A, B, and C are still ~2 million years older than in Andujar  
356 (Table 1), while these clades were even younger than the Andujar results when the Gondwana  
357 prior was omitted in addition to the root prior.

358 As expected, the recovery of nodes generally had similar posterior probabilities (PP) as in the  
359 study of Andujar and coworkers thus, nodes A, B, C had PPs of 1.0 in all instances.

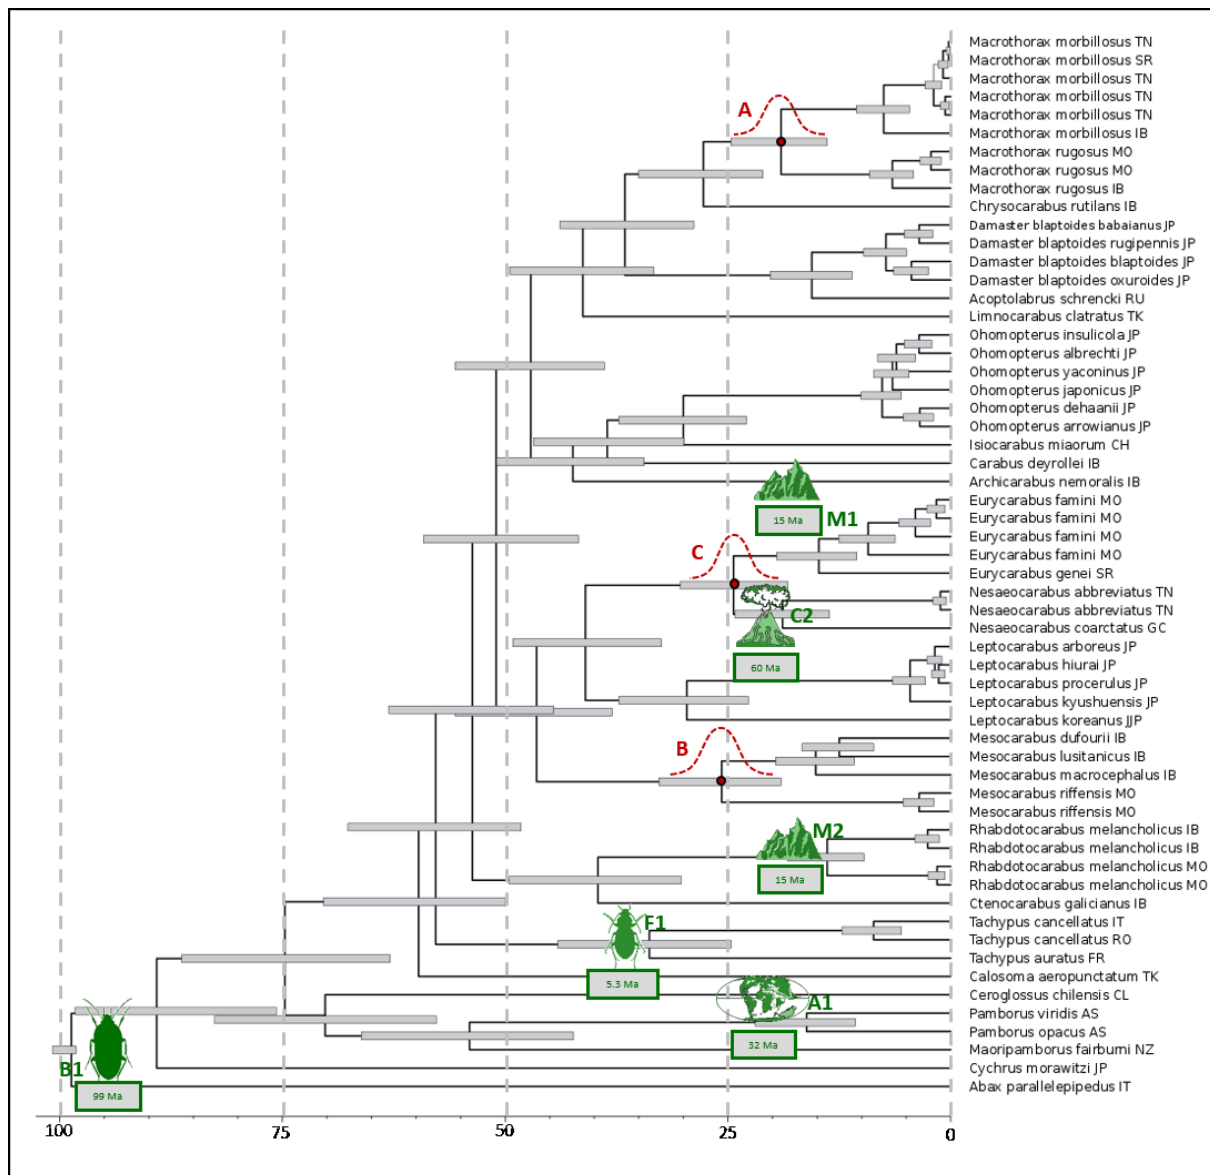

360  
361 **Figure 1 Ultrametric time-calibrated phylogenetic tree obtained with BEAST2 for *nd5* data in *Carabus*.** Green  
362 symbols depict calibration points employed – see **Table 3** for details. Red symbols depict cladogenetic events whose  
363 age distributions (see **Table 4**) have been utilized in subsequent analyses.

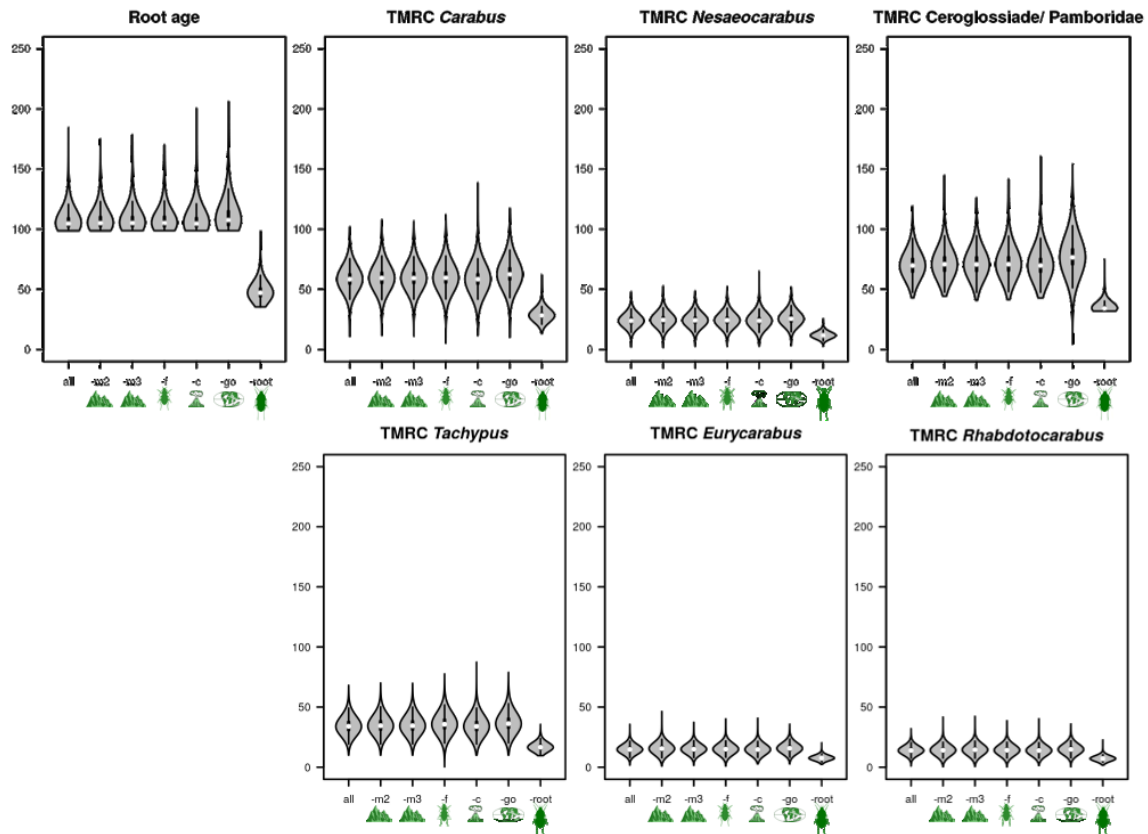

364  
 365 **Figure 2 Violin plots of TMRCA ages in relation to individual calibration points.** The plots depict mean (white dots), sd (black bars), 2\*sd (black line), and density distribution (gray shape) of a clade's age as obtained from the  
 366 calibration analyses in **Figure 1** for each major clade in relation to exclusion (grey) and exclusive inclusion (orange)  
 367 individual calibration points from the analysis. The x-axis denotes (letter) and depicts (icon) the respective calibration  
 368 points in the respective analysis.  
 369

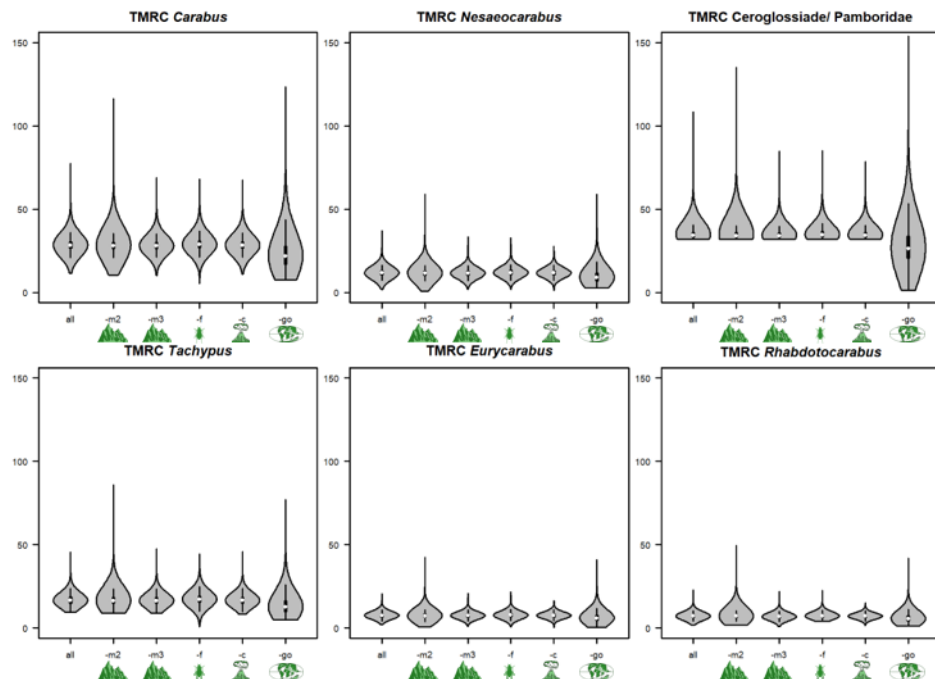

370  
 371 **Figure 3 Violin plots of TMRCA ages in relation to individual calibration points when the root dating is omitted.**  
 372 The plots depict mean (white dots), sd (black bars), 2\*sd (black line), and density distribution (gray shape) of a clade's  
 373 age as obtained from the calibration analyses in **Figure 1** for each major clade in relation to exclusion (grey) and  
 374 exclusive inclusion (orange) individual calibration points from the analysis. The x-axis denotes (letter) and depicts  
 375 (icon) the respective calibration points in the respective analysis.

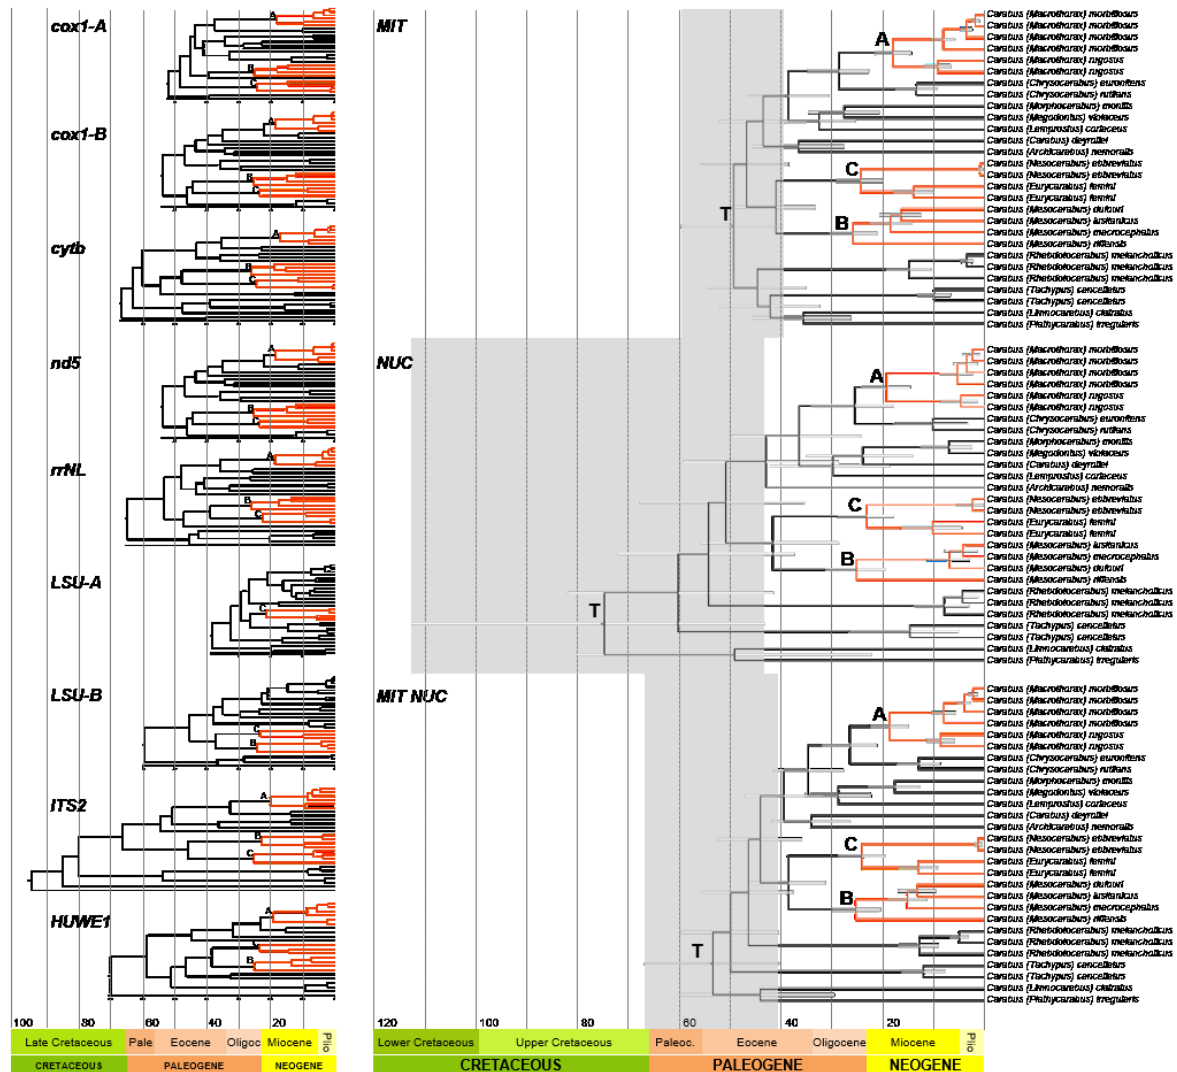

376  
377  
378 **Figure 4** Ultrametric time-calibrated trees obtained with BEAST2 for each individual (left) and combined  
379 **Figure 4** Ultrametric time-calibrated trees obtained with BEAST2 for each individual (left) and combined  
380 **Figure 4** Ultrametric time-calibrated trees obtained with BEAST2 for each individual (left) and combined  
381 **Figure 4** Ultrametric time-calibrated trees obtained with BEAST2 for each individual (left) and combined

382 **Table 1** Comparison of secondary calibration points derived in this study and in Andujar et al. 2011 for the  
383 **Table 1** Comparison of secondary calibration points derived in this study and in Andujar et al. 2011 for the  
384 **Table 1** Comparison of secondary calibration points derived in this study and in Andujar et al. 2011 for the  
385 **Table 1** Comparison of secondary calibration points derived in this study and in Andujar et al. 2011 for the  
386 **Table 1** Comparison of secondary calibration points derived in this study and in Andujar et al. 2011 for the  
387 **Table 1** Comparison of secondary calibration points derived in this study and in Andujar et al. 2011 for the

| NODE | CLADOGENETIC EVENT                                                  | Median Age and 95% HPD interval (Ma) |                       |                          |                        |
|------|---------------------------------------------------------------------|--------------------------------------|-----------------------|--------------------------|------------------------|
|      |                                                                     | Without root and go calibration      | Andujar et al.        | Without root calibration | With all calibrations  |
| A    | Split between <i>C. (M.) rugosus</i> and <i>C. (M.) morbillosus</i> | 7.15<br>(3.02-13.49)                 | 7.48<br>(6.05-9.14)   | 9.35<br>(6.73-12.50)     | 20.276<br>(15.3-26.3)  |
| B    | Split of <i>C. (M.) riffensis</i> from European <i>Mesocarabus</i>  | 9.61<br>(4.22-18.21)                 | 10.93<br>(8.90-13.26) | 12.81<br>(9.24-16.74)    | 25.653<br>(19.8-32.7)  |
| C    | Split between <i>Eurycarabus</i> and <i>Nesaeocarabus</i>           | 9.07<br>(3.64-16.71)                 | 9.51<br>(7.71-11.56)  | 11.79<br>(8.73-15.51)    | 23.276<br>(17.8-30.00) |

388

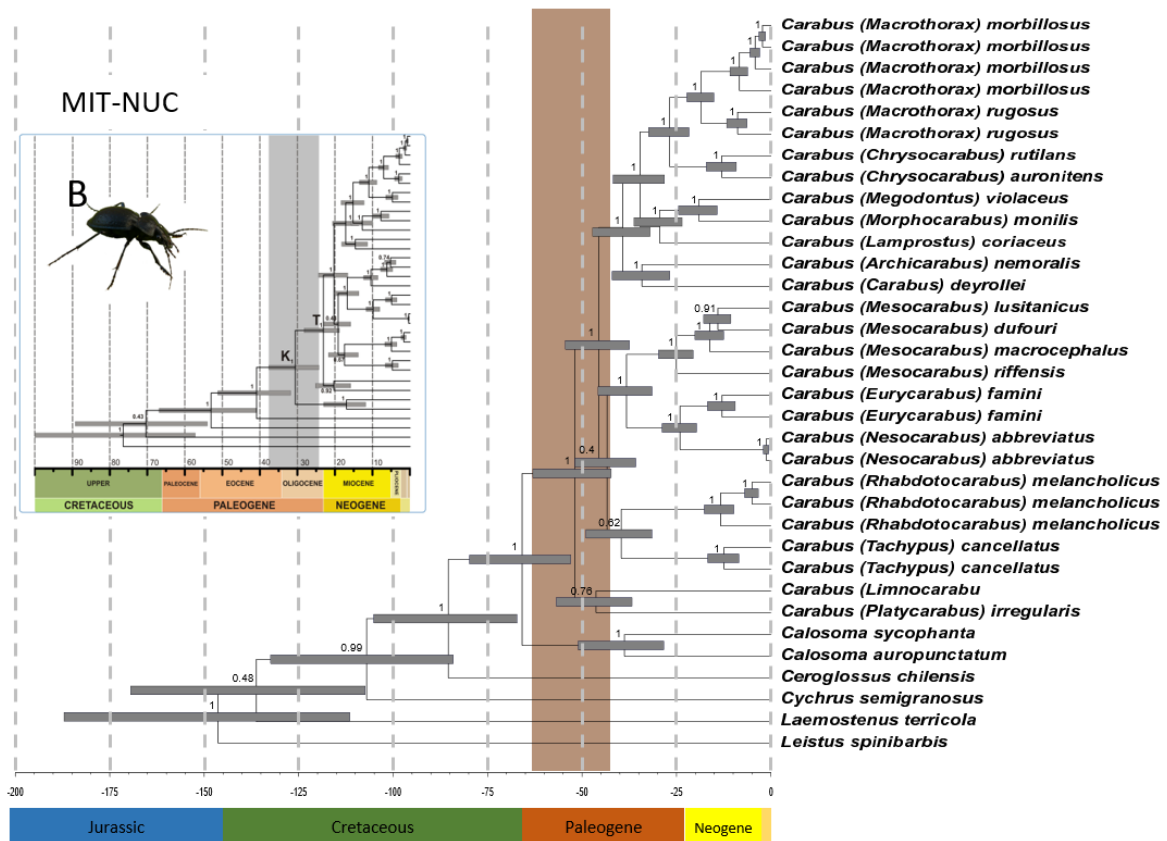

389  
 390 **Figure 5 Ultrametric time-calibrated trees obtained with BEAST2 for each individual (left) and combined**  
 391 **datasets (right) of the *Carabus* ingroup data set.** Red clades and letters A, B, and C, are given for the individual  
 392 gene trees when clades were supported by PP of more than 0.8, and for the latter likewise for the concatenated data  
 393 sets and are equivalent to the dated clades given in **Table 4**. Grey bars indicated the 95% HPD for the respective  
 394 nodes, with the TMRCA bar being superposed for the respective phylogeny.

## 395 **4.2 Time-calibrated gene trees and gene combination trees for the *Carabus*** 396 **ingroup and for the Carabidae**

397 Lineages A, B, and C were resolved in all gene trees and gene-combination trees except for  
 398 LSU-A, and LSU-B where A-B, and B could not be resolved with adequate posterior probabilities,  
 399 respectively. The derived median TMRCA of the *Carabus* clade varied markedly among genes  
 400 ranging from 35.01 Ma for LSU-A to 90.03 Ma for ITS2. All medians and 95% HPD intervals for  
 401 the respective genes and gene sets are given in Table 2. The ultrametric time-calibrated tree of  
 402 the MIT-NUC data set lead to a TMRCA of *Carabus* of 53.56 (41.25-67.05) Ma compared to  
 403 25.16 (18.41-33.04) in Andujar's study.

404

405

406

407

408

409

410

411 **Table 2 Estimates of molecular age of the *Carabus* clade according to gene or gene set.** Estimates were obtained  
 412 from an MCMC run of 100 mio iterations (sampling parameter values and trees every 10,000 iterations, with a burn-in  
 413 of 10%). With the exception of the evolutionary model used, which was inferred by bModelTest during the run, all  
 414 parameters were the same for all analyses.

| gene (set)     | This study          |                           |                          | Andujar et al. 2012 |                  |                          |
|----------------|---------------------|---------------------------|--------------------------|---------------------|------------------|--------------------------|
|                | Partition/<br>Clock | median / mean<br>age (Ma) | 95% HPD<br>interval (Ma) | Partition/<br>Clock | mean<br>age (Ma) | 95% HPD<br>interval (Ma) |
| <i>cox1-A</i>  | 2P/ULN              | 51.32 / 51.97             | 38.71-66.13              | 2P/SC               | 19.79            | 15.2-24.9                |
| <i>cox1-B</i>  | 2P/ULN              | 49.62 / 50.2              | 37.54-64.15              | 2P/SC               | 21.58            | 16.43-27.71              |
| <i>cytb</i>    | 2P/ULN              | 65.54 / 66.54             | 47.49-87.31              | 2P/SC               | 25.77            | 19.74-32.91              |
| <i>nd5</i>     | 2P/ULN              | 53.07 / 53.67             | 39.95-68.14              | NP/SC               | 20.71            | 151.9-26.15              |
| <i>rrNL</i>    | 2P/ULN              | 63.10 / 64.91             | 40.90-92.59              | NP/SC               | 29.91            | 19.4-42.76               |
| <i>LSU-A</i>   | NP/ULN              | 35.01 / 38.44             | 20.29-65.48              | NP/ULN              | 13.37            | 8.35-24.85               |
| <i>LSU-B</i>   | NP/ULN              | 59.44 / 64.15             | 30.56-108.45             | NP/ULN              | 20.36            | 11.23-36.61              |
| <i>ITS2</i>    | NP/ULN              | 90.03 / 94.68             | 48.14-151.44             | NP/ULN              | 31.17            | 16.8-52.47               |
| <i>HUWE1</i>   | NP/ULN              | 67.83 / 69.99             | 42.75-101.51             | NP/SC               | 30.83            | 21.79-41.36              |
| <i>MIT</i>     | 2P/ULN              | 48.16 / 49.16             | 39.64-59.36              | G-2P/SC             | 21.58            | 17.98-25.4               |
| <i>NUC</i>     | NP/ULN              | 72.02 / 74.85             | 43.25-112.86             | NP/ULN              | 28.5             | 16.97-44.65              |
| <i>MIT NUC</i> | G-2P/ULN            | 51.96 / 52.25             | 42.27-63.01              | G-2P/ULN            | 25.16            | 18.41-33.04              |

## 415 5 Discussion

### 416 The time scale of *Carabus* evolution

417 We here reanalyzed the data presented by Andujar and coworkers<sup>13</sup> in their study on the  
 418 phylogenetic timing of the genus *Carabus* in the light of fossil evidence, the Gondwana split, and  
 419 differing biogeographical interpretation of the geological record. We based our differing  
 420 interpretation on a review of recent literature dealing with i) taxa that have a Gondwanan  
 421 distribution, extracting minimum and maximum calibration ages; ii) the onset of the Canary  
 422 hotspot, and iii) the uplift of the North African mountains. As expected, our study pushed the date  
 423 of crown *Carabus* well beyond the Oligocene-Miocene dating of Andujar and coworkers to the  
 424 Early Eocene when considering mitochondrial genes, and well into the Late Cretaceous when  
 425 considering the nuclear genes of this study. Consequently, our findings support the model of  
 426 Penev et al.<sup>15</sup> and Toussaint & Gillett<sup>26</sup> that species of *Carabus* were already present in the  
 427 early Cenozoic. Also, our timing does not support evidence for a phylogenetic standstill of 50-60  
 428 My within Carabidae as it has to be assumed based on the data presented by Andujar et al. Figure  
 429 5. Furthermore, the Carabidae results now also fall in line with results from other taxa, for  
 430 example, the dating of the Pelodryadinae-Phyllomedusinae split at 51.4 Ma (36.4-65.8) linked to  
 431 the breakaway of Australia from South America<sup>10</sup>. We consider this resemblance significant as  
 432 Anura are known to show congruent evolutionary patterns with ground beetles based on similarly  
 433 strong habitat ties<sup>71</sup> and thus this likely is not just a random match. However, we do have to  
 434 stress that the rewinding effect is almost entirely based on the two fossils that were used to  
 435 calibrate the root. Nevertheless, leaving these fossils out still led to a rewinding of the clock based  
 436 on the inclusion of the Gondwanan split (Figure 3) though to a much lesser extent that would  
 437 fail to reconcile the *Carabus* time tree with the existence of these fossils.

438 More specifically, when comparing the impact of the different added calibration points it is  
439 evident, that the inclusion of the Harpalinae fossils from Burmese amber as the root calibration  
440 has by far the strongest impact. Necessarily, this is true for the dating of the root itself, given that  
441 we implemented this fossil with a hard lower bound. In the extended nd5 calibration analyses  
442 this translates to a difference of almost 50 million years for the root when including or leaving this  
443 calibration point out (see Figure 2 and Table 2). Concerning the younger lineages, the root and  
444 the other calibration points produce more congruent results (Figure 2). The pattern has a similar  
445 but weaker trend when comparing the ultrametric time-calibrated trees obtained from the MIT  
446 data and the NUC or the combined MIT/NUC data set (Figure 4). This also implies that the dating  
447 of the internal clades will likely not be pushed back much further unless new older fossil evidence  
448 will appear. The initial split between *Carabus* and *Calosoma* is situated some 41 and 67 Ma  
449 (Andujar et al: 33-18 Ma<sup>13</sup>) and thus occurred contemporarily with the final major phase of the  
450 breakup of Laurasia and opening of the northern Atlantic Ocean and therewith, with the split of  
451 the Nearctic and Palearctic regions in this part of the northern hemisphere. Andujar et al.<sup>13</sup>  
452 argued that the much younger *Carabus/Calosoma* split as derived from their analyses is  
453 congruent with the observation that *Carabus* is more diverse in the Palearctic region particularly  
454 due to low dispersal ability of the flightless species. However, the assumption of a flightless  
455 genus *Carabus* is misleading. Since functional hind wings are occasionally present in the extant  
456 species *Carabus (Limnocarabus) clatratus* and particularly in *C. (Carabus) granulatus* of the  
457 more terminal Digitulati group, flight capability must have been a trait not only for the most recent  
458 common ancestor (TMRCA) of the genus *Carabus* but for all TMRCA of its major lineages.  
459 Consequently, flight capability has to be assumed as an important precondition for the  
460 colonization of several marginal parts of the genus' distributional area. This is particularly true in  
461 the south, such as the Canary Islands and the North African Mountains as discussed in the  
462 Material and Methods section of this study. Also it is very probably the precondition for the  
463 achievement of trans-Palearctic and trans-Holarctic distributions in several of the extant lineages  
464 (apart from those species which were dispersed by human activities just recently). The  
465 evolutionary events that originate the main extant lineages according to our data took place  
466 during the Mid and Late Paleogene and thus much earlier than estimated by Andujar et al.<sup>13</sup> and  
467 Deuve et al.<sup>14</sup>. As such they are probably associated with the reorganization of the terrestrial  
468 biomes of the northern hemispheric regions due to climatic shifts<sup>72</sup> and major geomorphological  
469 events in Central and East Asia resulting from the uplift of the Himalaya-Tibet orogenic system  
470<sup>73-76</sup>. Since *Carabus* beetles are strictly adapted to the temperate climate and are thus absent in  
471 the tropics, climatic shifts might have had major impacts on the early distributional history of the  
472 genus, while the Neogene orogenic evolution of the northern hemisphere was the main driver  
473 for allopatric diversification within the terminal lineages which resulted in an enormous number  
474 of wingless local endemic species particularly in the mountains of the mid-latitudes.

475 Given the high impact of the root calibration on the dating results the future addition of Carabidae  
476 ingroup fossils originating from different geological periods to the analysis is mandatory.  
477 However, pre-Miocene Carabidae fossils are not found up to today. Concerning the markedly  
478 diverging *Carabus – Calosoma* divergence time estimations presented in the more  
479 comprehensive molecular phylogenetic beetle studies of Toussaint & Gillet<sup>20</sup>: about 133 (98-  
480 172) Ma and McKenna et al.<sup>27</sup>: 34 (18-57) Ma), which each are based on a large set of outgroup  
481 fossils, our results take an intermediate position and thus have some likelihood of standing up  
482 also in the future.

### 483 **Biogeographic Dating in the light of specific life history**

484 Preferences for certain climatic conditions as well as dispersal ability of the species group have  
485 to be considered when geographical events are used to date phylogenetic events. Since  
486 *Carabus* is an extratropical genus with all its species being strictly adapted to the warm  
487 temperate or colder climates, there is no doubt about the origin of the genus *Carabus* in the  
488 northern parts of today's Palearctic region. However, up to today, there is no clear evidence for  
489 a more detailed geographical origin. Previous molecular phylogenetic studies of the genus by  
490 Deuve et al.<sup>14</sup> show a simultaneous appearance of western (*Arcifera*, *Tachypus*) and eastern

491 Palearctic elements (*Crenolimbi*, *Spinulati*) at the base of the *Carabus* tree. Reconstructing the  
492 early distributional history of the genus is more difficult since active dispersal by flight has to be  
493 assumed for the ancestors of most of the extant clades as discussed in the previous section.  
494 However, previous phylogenetic studies were probably biased by the author's preoccupation with  
495 extant *Carabus* species being 99% wingless and thus underestimated the true historical  
496 dispersal ability of the species. E.g., the emergence of the subgenus *Nesaeocarabus* on the  
497 Canary Islands, which is one of the dating points in previous phylogenetic studies of the genus  
498 <sup>1314</sup>, has to be considered under the light of active dispersal from North Africa or southwestern  
499 Europe by flight. Dispersal by flight is likewise a most probable explanation for Europe-North  
500 Africa trans-Mediterranean distributional patterns as observed in the subgenera *Eurycarabus*  
501 and *Raptocarabus*. However, previous authors very probably assume dispersal "on foot"  
502 because of the desiccation of the Strait of Gibraltar during the Messinian crisis (about 6-5 Ma)  
503 and thus a short period of terrestrial connection of the continents was considered the prerequisite  
504 of the dispersal of the respective lineages <sup>1314</sup>. In the Material and Methods section, we have  
505 summarized arguments to reject this scenario since it is in strong contrast to the habitat  
506 preferences of the species. If active dispersal by flight is taken into account while discussing the  
507 dispersal history of the genus or using vicariance in biogeographic dating, the emergence and  
508 distribution of humid temperate habitats should be considered a much more important factor than  
509 terrestrial pathways. Consequently, concerning the trans-Mediterranean distributional patterns  
510 in some of the *Carabus* lineages, in pre-Pliocene times the distribution of mountainous areas as  
511 the provider of humid temperate habitats in the Mediterranean region, such as the North African  
512 mountain ranges, can be seen as the most important clue for the distribution of potential  
513 paleohabitats of the species.

## 514 **6 Conclusions**

515 Our study stresses the general need for a more differentiated and transparent usage of  
516 geological calibration points depending on life-history traits and habitat requirements of the taxa  
517 under study. Geological events need to be strictly interpreted from a biogeographic perspective  
518 including taxon-specific habitat suitability and dispersal abilities. Too often, geological events  
519 such as the Messinian salinity crisis or the opening/closing of the Strait of Gibraltar are  
520 transferred uncritically from a taxon where they might have enacted significant evolutionary  
521 pulses to taxa where they do not. Fossils play a crucial role as primary calibration points and  
522 much more effort should be invested in the future to improve the fossil database. In the here  
523 presented case of the dating of the *Carabus* clade, our study shows that the inclusion of fossil  
524 evidence in combination with taxon-specific biogeographic features results in a much earlier  
525 TMRC age of this clade. However, our conclusions should be considered preliminary due to the  
526 strong impact of the root calibration on the dating results. Additional Carabidae ingroup fossils  
527 are needed to prove our hypothesis, particularly those from pre-Miocene deposits.

## 528 **7 Funding**

529 The study was supported by Grants of the German Research Council (DFG) to Lars Opgenoorth  
530 (OP-219/2-1) and Joachim Schmidt (SCHM-3005/1-1).

### 531 **7.1 Authors' contributions**

532 All three authors contributed to all parts of the manuscript and read and approved the final  
533 manuscript.

534

## 535 8 References

- 536 1. Dos Reis, M., Donoghue, P. C. J. & Yang, Z. Bayesian molecular clock dating of species  
537 divergences in the genomics era. *Nat. Rev. Genet.* **17**, 71–80 (2016).
- 538 2. Duchêne, S., Lanfear, R. & Ho, S. Y. W. W. The impact of calibration and clock-model  
539 choice on molecular estimates of divergence times. *Mol. Phylogenet. Evol.* **78**, 277–289  
540 (2014).
- 541 3. Schmidt, J., Belousov, I. & Michalik, P. X-ray microscopy reveals endophallic structures in  
542 a new species of the ground beetle genus *Trechus* Clairville, 1806 from Baltic amber  
543 (Coleoptera, Carabidae, Trechini). *Zookeys* **2016**, 113–127 (2016).
- 544 4. Schmidt, J. & Michalik, P. The ground beetle genus *Bembidion* latreille in baltic amber:  
545 Review of preserved specimens and first 3D reconstruction of endophallic structures  
546 using X-ray microscopy (Coleoptera, Carabidae, Bembidiini). *Zookeys* **2017**, 101–126  
547 (2017).
- 548 5. Renner, S. S. Available data point to a 4-km-high Tibetan Plateau by 40 Ma, but 100  
549 molecular-clock papers have linked supposed recent uplift to young node ages. *J.*  
550 *Biogeogr.* **43**, 1479–1487 (2016).
- 551 6. Sanmartín, I. & Ronquist, F. Southern hemisphere biogeography inferred by event-based  
552 models: Plant versus animal patterns. *Syst. Biol.* **53**, 216–243 (2004).
- 553 7. Brundin, L. *Transantarctic relationships and their significance, as evidenced by*  
554 *Chironomid midges. Kungliga Svenska vetenskapsakademiens handlingar* vol. 4 (1966).
- 555 8. McCulloch, G. A., Wallis, G. P. & Waters, J. M. A time-calibrated phylogeny of southern  
556 hemisphere stoneflies: Testing for Gondwanan origins. *Mol. Phylogenet. Evol.* **96**, 150–  
557 160 (2016).
- 558 9. Sharma, P. P. *et al.* A revised dated phylogeny of scorpions: Phylogenomic support for  
559 ancient divergence of the temperate Gondwanan family Bothriuridae. *Mol. Phylogenet.*  
560 *Evol.* **122**, 37–45 (2018).
- 561 10. Frazão, A., Da Silva, H. R. & De Moraes Russo, C. A. The gondwana breakup and the  
562 history of the atlantic and indian oceans unveils two new clades for early neobatrachian  
563 diversification. *PLoS One* **10**, 1–18 (2015).
- 564 11. Swenson, U., Hill, R. S. & Mcloughlin, S. Biogeography of *Nothofagus* Supports the  
565 Sequence of Gondwana break-up. **50**, 1025–1041 (2018).
- 566 12. Cook, L. G. & Crisp, M. D. Not so ancient: The extant crown group of *Nothofagus*  
567 represents a post-Gondwanan radiation. *Proc. R. Soc. B Biol. Sci.* **272**, 2535–2544  
568 (2005).
- 569 13. Andujar, C. *et al.* Winding up the molecular clock in the genus *Carabus* (Coleoptera:  
570 Carabidae): Assessment of methodological decisions on rate and node age estimation.  
571 *BMC Evol. Biol.* **12**, 1–16 (2012).
- 572 14. Deuve, T., Cruaud, A., Genson, G. & Rasplus, J. Y. Molecular systematics and  
573 evolutionary history of the genus *Carabus* (Col. Carabidae). *Mol. Phylogenet. Evol.* **65**,  
574 259–275 (2012).
- 575 15. Penev, L., Casale, A. & Turin, H. Chapter 8 Biogeography. in *The Genus Carabus in*  
576 *Europe* (eds. Turin, H., Penev, L. & Casale, A.) 327–369 (Pensoft Publishers, 2003).



- 577 16. Deuve, T. *Illustrated Catalogue of the Genus Carabus of the World*. (Pensoft Publishers,  
578 2004).
- 579 17. Erwin, T. L. *A treatise of the western hemisphere Caraboidea (Coleoptera). Their  
580 classification, distributions, and way of life. Volume I*. (Pensoft Publishers, 2007).
- 581 18. Bousquet, I., Brezina, A., Davies, J., Farkac, J. & Smetana, A. Tribe Carabini. in *Catalogue  
582 of Palaearctic Coleoptera. Volume 1. Revised and Updated Edition. Archostemata –  
583 Myxophaga – Adephaga*. (eds. Löbl, I. & Löbl, D.) 63–207 (Pensoft Publishers, 2017).
- 584 19. Prüser, F. & Mossakoski, D. Conflicts in phylogenetic relationships and dispersal history  
585 of the supertribe Carabitae (Coleoptera: Carabidae). in *Phylogeny and classification of  
586 Caraboidea (Coleoptera: Adephaga)*. (eds. Ball, G. E., Casale, A. & Taglianti, A. V.) 297–  
587 328 (Museo Regionale die Scienze Naturali, 1998).
- 588 20. Toussaint, E. F. A. & Gillett, C. P. D. T. Rekindling Jeannel's Gondwanan vision?  
589 Phylogenetics and evolution of Carabinae with a focus on Calosoma caterpillar hunter  
590 beetles. *Biol. J. Linn. Soc.* **123**, 191–207 (2018).
- 591 21. Deuve, T. & Faille, A. Structure secondaire de IARN 18S et phylogénie basale du genre  
592 Carabus L., 1758 (Coleoptera: Carabidae). *Ann. la Soc. Entomol. Fr.* **49**, 430–445 (2013).
- 593 22. Osawa, Syozo; Su, Z.H.; Imura, Y. Phylogeny and Distribution of the Subfamily Carabinae.  
594 in *Molecular phylogeny and evolution of Carabid ground beetles* (ed. Osawa, Syozo; Su,  
595 Z.H.; Imura, Y.) 25–32 (Springer, 2004).
- 596 23. DEUVE, T. Trois fossiles remarquablement conservés du Miocène de France,  
597 appartenant aux genres Carabus L. et Ledouxnebria nov. (Coleoptera, Carabidae et  
598 Nebriidae). *Bull. la Société Entomol. Fr.* **103**, 229–236 (1998).
- 599 24. Erwin, T. L. Thoughts on the Evolutionary History of Ground Beetles: Hypotheses  
600 Generated from Comparative Faunal Analyses of Lowland Forest Sites in Temperate and  
601 Tropical Regions. in *Carabid Beetles: Their Evolution, Natural History, and Classification*  
602 (eds. Erwin, T. L., Ball, G. E. & Whitehead, D. R.) 539–592 (Dr. W. Junk bv Publishers,  
603 1979).
- 604 25. McKenna, D. D. *et al.* The beetle tree of life reveals that Coleoptera survived end-Permian  
605 mass extinction to diversify during the Cretaceous terrestrial revolution. *Syst. Entomol.*  
606 **40**, 835–880 (2015).
- 607 26. Toussaint, E. F. A. *et al.* The peril of dating beetles. *Syst. Entomol.* **42**, 1–10 (2017).
- 608 27. McKenna, D. D. *et al.* The evolution and genomic basis of beetle diversity. *Proc. Natl.*  
609 *Acad. Sci. U. S. A.* **116**, 24729–24737 (2019).
- 610 28. Ortuño, V. M. & Arillo, A. Fossil carabids from Baltic amber – I – A new species of the  
611 genus Calathus Bonelli, 1810 (Coleoptera: Carabidae: Pterostichinae). *Zootaxa* **61**, 55–  
612 61 (2009).
- 613 29. Gamboa, S. & Ortuño, V. M. A new fossil species of the genus Coptodera Dejean, 1825  
614 (Coleoptera: Carabidae: Lebiinae) from Baltic amber. *Zootaxa* **3981**, 592–596 (2015).
- 615 30. Schmidt, J. Eocene age of Limodromus Motschulsky, 1850, with description of L.  
616 hoffeinsorum sp. n. from Baltic Amber (Coleoptera, Carabidae, Platynini). *Zootaxa* **3974**,  
617 573–581 (2015).
- 618 31. Ponomarenko, A. G. Suborder Adephaga. in *Mezozoiskie Zhestkokrylye* (eds. Arnold'di,  
619 L. V, Zherikhin, V. V, Nikritin, L. M. & Ponomarenko, A. G.) 17–104 (Nauka Publishers,  
620 1977).

- 621 32. Liu, Y., Shi, H., Cai, C., Liang, H. & Huang, D. The first record of Cretaceous ground beetle  
622 (Coleoptera: Carabidae: Oodini) from Burmese amber. *Cretac. Res.* **52**, 427–430 (2015).
- 623 33. Beutel, R. G. *et al.* Burmapseudomorphus planus gen. et sp. nov. – a Late Cretaceous  
624 stem group member of the specialized Pseudomorphini (Carabidae, Coleoptera) from  
625 northern Myanmar. *Cretac. Res.* **107**, 104274 (2020).
- 626 34. Maddison, D., Baker, M. & Ober, K. Phylogeny of carabid beetles as inferred from 18S  
627 ribosomal DNA (Coleoptera: Carabidae). *Syst. Entomol.* **24**, 103–138 (1999).
- 628 35. Maddison, D. R. *et al.* Monophyly of terrestrial adaphagan beetles as indicated by three  
629 nuclear genes (Coleoptera: Carabidae and Trachypachidae). *Zool. Scr.* **38**, 43–62 (2009).
- 630 36. López-López, A. & Vogler, A. P. The mitogenome phylogeny of Adephaga (Coleoptera).  
631 *Mol. Phylogenet. Evol.* **114**, 166–174 (2017).
- 632 37. Ober, K. A. & Heider, T. N. Phylogenetic diversification patterns and divergence times in  
633 ground beetles (Coleoptera: Carabidae: Harpalinae). *BMC Evol. Biol.* **10**, (2010).
- 634 38. Ober, K. A. Rapid Diversification and Evolution in Ground Beetles. *Am. Entomol.* **57**, 47–  
635 49 (2011).
- 636 39. Faille, A., Casale, A., Balke, M. & Ribera, I. A molecular phylogeny of Alpine subterranean  
637 Trechini (Coleoptera: Carabidae). *BMC Evol. Biol.* **13**, (2013).
- 638 40. Faille, A., Andújar, C., Fadrique, F. & Ribera, I. Late Miocene origin of an Ibero-Maghrebian  
639 clade of ground beetles with multiple colonizations of the subterranean environment. *J.*  
640 *Biogeogr.* **41**, 1979–1990 (2014).
- 641 41. Faille, A., Bourdeau, C., Belles, X. & Fresneda, J. Allopatric speciation illustrated: The  
642 hypogean genus *Geotrechus* Jeannel, 1919 (Coleoptera: Carabidae: Trechini), with  
643 description of four new species from the Eastern Pyrenees (Spain). *Arthropod Syst.*  
644 *Phylogeny* **73**, 439–455 (2015).
- 645 42. López-López, A., Abdul Aziz, A. & Galián, J. Molecular phylogeny and divergence time  
646 estimation of *Cosmodela* (Coleoptera: Carabidae: Cicindelinae) tiger beetle species from  
647 Southeast Asia. *Zool. Scr.* **44**, 437–445 (2015).
- 648 43. Mossakowski, D. The mandible of *Maoripamborus*: An indication of convergent evolution  
649 in Cychrini and Pamborini. in *How to protect or what we know about carabid beetles* (ed.  
650 Szyzkó, J.) 95–100 (Warsaw Agricultural University Press, 2002).
- 651 44. Venables, W. N. & Ripley, B. D. *Modern Applied Statistics with S*. (Springer, 2002).
- 652 45. Heads, M. *Biogeography of Australasia: A molecular analysis*. (2014).
- 653 46. Carracedo, J. C. & Troll, V. R. *The geology of the Canary Islands*. (Elsevier, 2016).
- 654 47. Holik, J. S. & Rabinowitz, P. D. Effects of Canary hotspot volcanism on structure of oceanic  
655 crust off Morocco. *J. Geophys. Res.* **96**, 39–67 (1991).
- 656 48. Chain, V. E. & Koronovskij, N. *Nordasien*. (Enke, 1995).
- 657 49. Wakita, K. Geology and tectonics of Japanese islands: A review - The key to  
658 understanding the geology of Asia. *J. Asian Earth Sci.* **72**, 75–87 (2013).
- 659 50. Deuve, T. *Cychrus Calosoma et Carabus de Chine*. (2013).
- 660 51. Bertolani-Marchetti, D. Pollen paleoclimatology in the Mediterranean since Messinian  
661 time. in *Geological evolution of the Mediterranean Basin* (eds. Stanley, D. J. & Wezel, F.

- 662 C.) 589 (Springer, 1985).
- 663 52. Mai, D. H. *Tertiäre Vegetationsgeschichte Europas. Methoden und Ergebnisse.* (Gustav  
664 Fischer, 1995).
- 665 53. Chalouan, A., Michard, A., Feinberg, H., Montigny, R. & Saddiqi, O. The Rif mountain  
666 building (Morocco); a new tectonic scenario. *Bulletin de la Societe Geologique de France*  
667 vol. 172 603–616 (2001).
- 668 54. Orogeny, V. & St, M. Mediterranean Tectonics. *Encycl. Geol.* 135 (2005).
- 669 55. Monié, P., Torres-Roldán, R. L. & García-Casco, A. Cooling and exhumation of the  
670 Western Betic Cordilleras, 40Ar/39Ar thermochronological constraints on a collapsed  
671 terrane. *Tectonophysics* **238**, 353–379 (1994).
- 672 56. Platt, J. P. *et al.* Thermal evolution, rate of exhumation, and tectonic significance of  
673 metamorphic rocks from the floor of the Alboran extensional basin, western  
674 Mediterranean. *Tectonics* **17**, 671–689 (1998).
- 675 57. Monié, P., Maluski, H., Saadallah, A. & Gaby, R. New<sup>39</sup>Ar-<sup>40</sup>Ar ages of Hercynian and  
676 Alpine thermotectonic events in Grande Kabylie (Algeria). *Tectonophysics* **152**, 53–69  
677 (1988).
- 678 58. Missenard, Y. *et al.* Crustal versus asthenospheric origin of relief of the Atlas mountains  
679 of Morocco. *J. Geophys. Res. Solid Earth* **111**, 1–13 (2006).
- 680 59. Babault, J., Teixell, A., Arboleya, M. L. & Charroud, M. A late Cenozoic age for long-  
681 wavelength surface uplift of the Atlas Mountains of Morocco. *Terra Nov.* **20**, 102–107  
682 (2008).
- 683 60. Upchurch, P. Gondwanan break-up: legacies of a lost world? *Trends Ecol. Evol.* **23**, 229–  
684 236 (2008).
- 685 61. White, L. T., Gibson, G. M. & Lister, G. S. A reassessment of paleogeographic  
686 reconstructions of eastern Gondwana: Bringing geology back into the equation.  
687 *Gondwana Res.* **24**, 984–998 (2013).
- 688 62. van den Ende, C., White, L. T. & van Welzen, P. C. The existence and break-up of the  
689 Antarctic land bridge as indicated by both amphi-Pacific distributions and tectonics.  
690 *Gondwana Res.* **44**, 219–227 (2017).
- 691 63. Ponomarenko, A. G. Description of new taxa. Suborder Adephaga [in Russian]. in  
692 *Mezozoiskie Zhestkokrylye. Akademiya Nauk SSSR, Trudy Paleontologicheskogo*  
693 *Instituta* 17–96 (Nauka Publishers, 1977).
- 694 64. Crowson, R. A. *The natural classification of the families of Coleoptera.* (Lloyd, 1955).
- 695 65. Beutel, R. Über Phylogenese und Evolution der Coleoptera (Insecta), insbesondere der  
696 Adephaga. *Abhandlungen des Naturwissenschaftlichen Vereins Hambg.* **31**, 3–164  
697 (1997).
- 698 66. Bouckaert, R. *et al.* BEAST 2: A Software Platform for Bayesian Evolutionary Analysis.  
699 *PLoS Comput. Biol.* **10**, 1–6 (2014).
- 700 67. Miller, M. A., Pfeiffer, W. & Schwartz, T. Creating the CIPRES Science Gateway for  
701 inference of large phylogenetic trees. *2010 Gatew. Comput. Environ. Work. GCE 2010*  
702 (2010) doi:10.1109/GCE.2010.5676129.
- 703 68. Adler, D. & Kelly, S. T. vioplot: violin plot. R package version 0.3.2. (2018).

- 704 69. Bouckaert, R. R. & Drummond, A. J. bModelTest: Bayesian phylogenetic site model  
705 averaging and model comparison. *BMC Evol. Biol.* **17**, 1–11 (2017).
- 706 70. Rambaut, A., Drummond, A. J., Xie, D., Baele, G. & Suchard, M. A. Posterior  
707 Summarization in Bayesian Phylogenetics Using Tracer 1.7. *Syst. Biol.* **67**, 901–904  
708 (2018).
- 709 71. Hofmann, S. *et al.* Molecular Phylogenies indicate a Paleo-Tibetan Origin of Himalayan  
710 Lazy Toads (*Scutigera*). *Sci. Rep.* **7**, 1–12 (2017).
- 711 72. Zachos, J., Pagani, M., Sloan, L., Thomas, E. & Billups, K. Trends, rhythms, and  
712 aberrations in global climate 65 Ma to present. *Science*, **292**, 686–693 (2001).
- 713 73. Molnar, P., England, P. & Martinod, J. Mantle dynamics, uplift of the Tibetan Plateau, and  
714 the Indian Monsoon. 357–396 (1993).
- 715 74. Harrison, T., Copeland, P., Kidd, W. & Yin, A. Raising Tibet. *Science*, **255**, 1663–1670  
716 (1992).
- 717 75. Li, Y. *et al.* Propagation of the deformation and growth of the Tibetan-Himalayan orogen:  
718 A review. *Earth-Science Rev.* **143**, 36–61 (2015).
- 719 76. Lippert, P. C., van Hinsbergen, D. J. J. & Dupont-Nivet, G. Early Cretaceous to present  
720 latitude of the central proto-Tibetan Plateau: A paleomagnetic synthesis with implications  
721 for Cenozoic tectonics, paleogeography, and climate of Asia. 1–21 (2014)  
722 doi:10.1130/2014.2507(01).
- 723
- 724
- 725
